# Supplementary material for: Broadleaf afforestation impacts on terrestrial hydrology insignificant compared to climate change in Great Britain
Source: Copernicus journal article supplement (doi:10.5194/hess-28-2081-2024), 2024-05-08
Supplement: Supplementary file 1 [file hess-28-2081-2024-supplement.pdf]

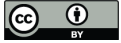

*Supplement of*

## **Broadleaf afforestation impacts on terrestrial hydrology insignificant compared to climate change in Great Britain**

**Marcus Buechel et al.**

*Correspondence to:* Marcus Buechel ([marcus.buechel@ouce.ox.ac.uk](mailto:marcus.buechel@ouce.ox.ac.uk))

The copyright of individual parts of the supplement might differ from the article licence.

This supplementary material includes six figures, four tables and an equation.

**Table of Contents**

|    |                             |    |
|----|-----------------------------|----|
|    | Supplementary Figures ..... | 2  |
| 10 | Supplementary Tables .....  | 8  |
|    | Supplementary Equation..... | 13 |

## Supplementary Figures

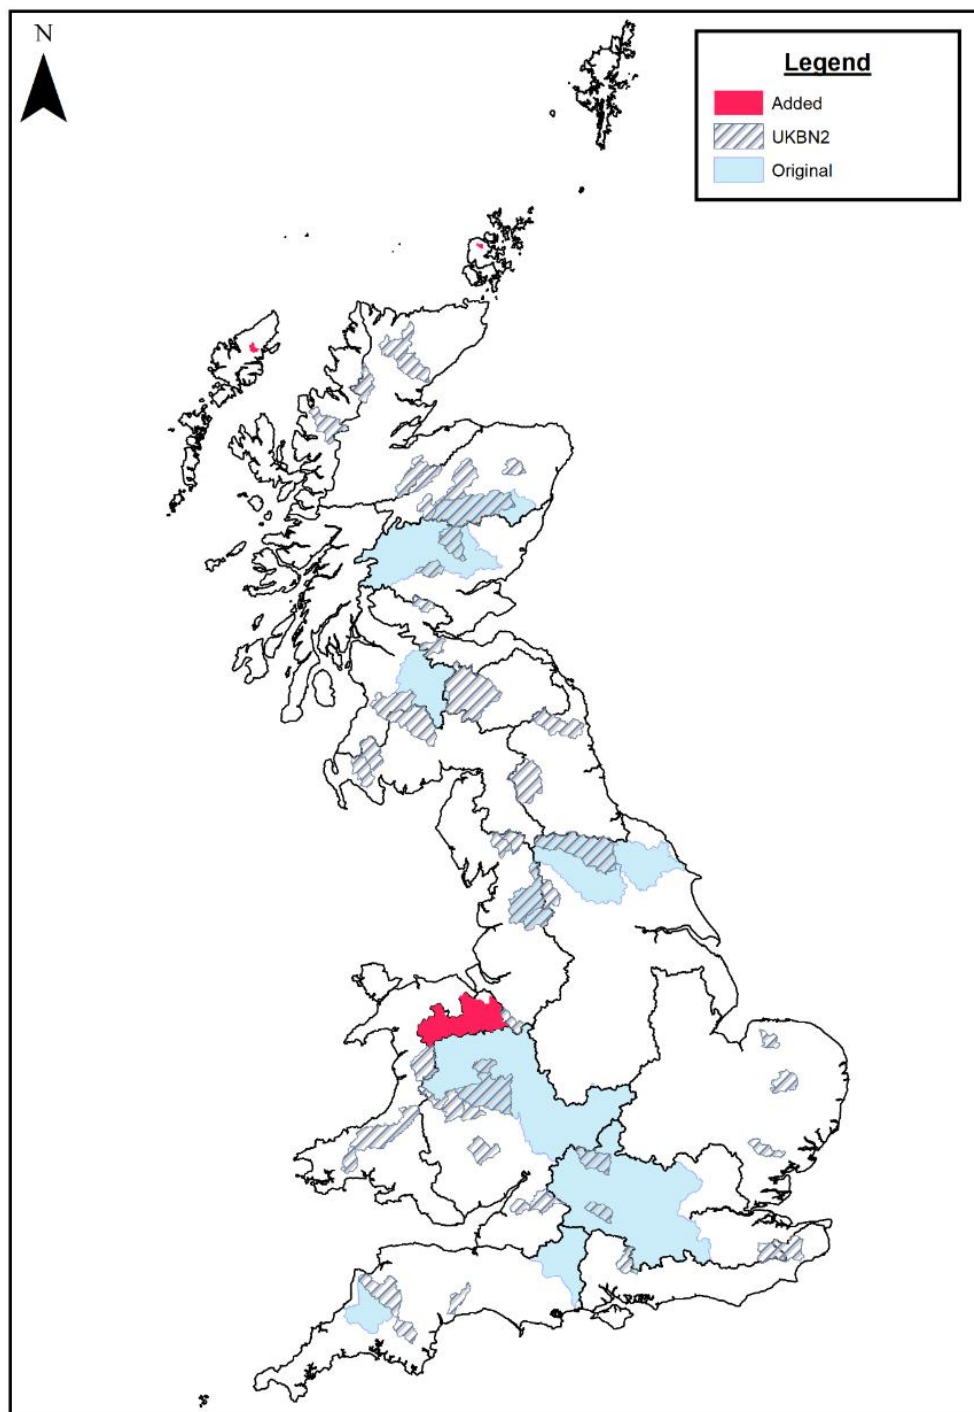

15

Figure S1: Map of the 51 catchments used to study streamflow changes to afforestation and climate. They include the original catchments studied in Buechel et al. (2022), near-natural catchments over 150 km<sup>2</sup> from the UKBN2 network and the catchment for the Dee and regions in Scottish hydro-regions where there were no catchments from the initial selection.

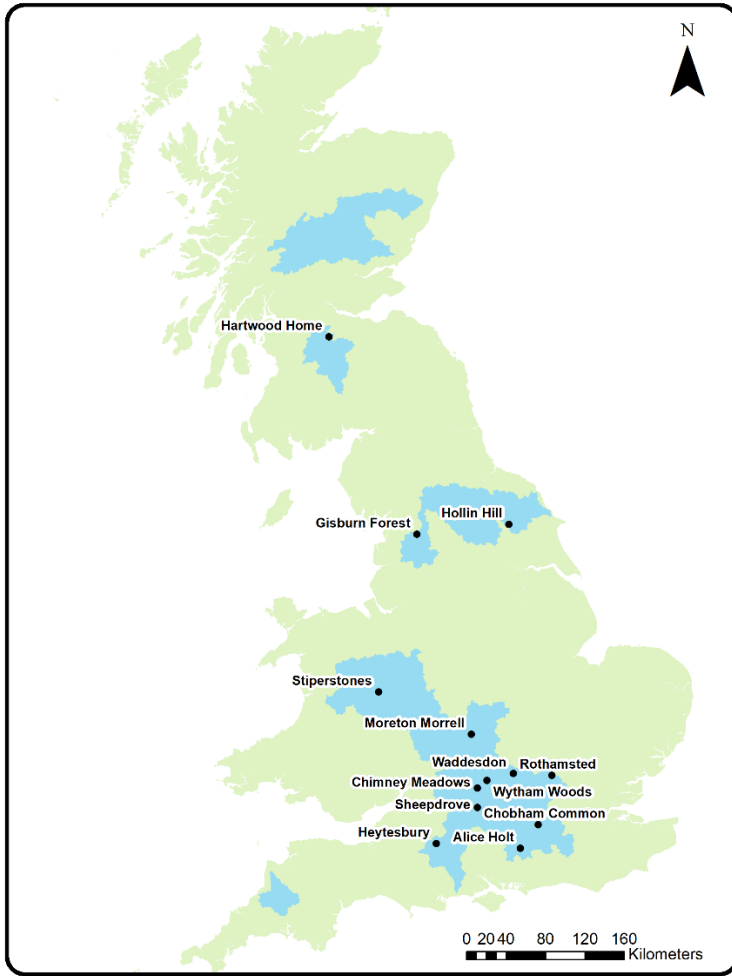

20

Figure S2. Location of the COSMOS-UK sites used to validate model outputs.

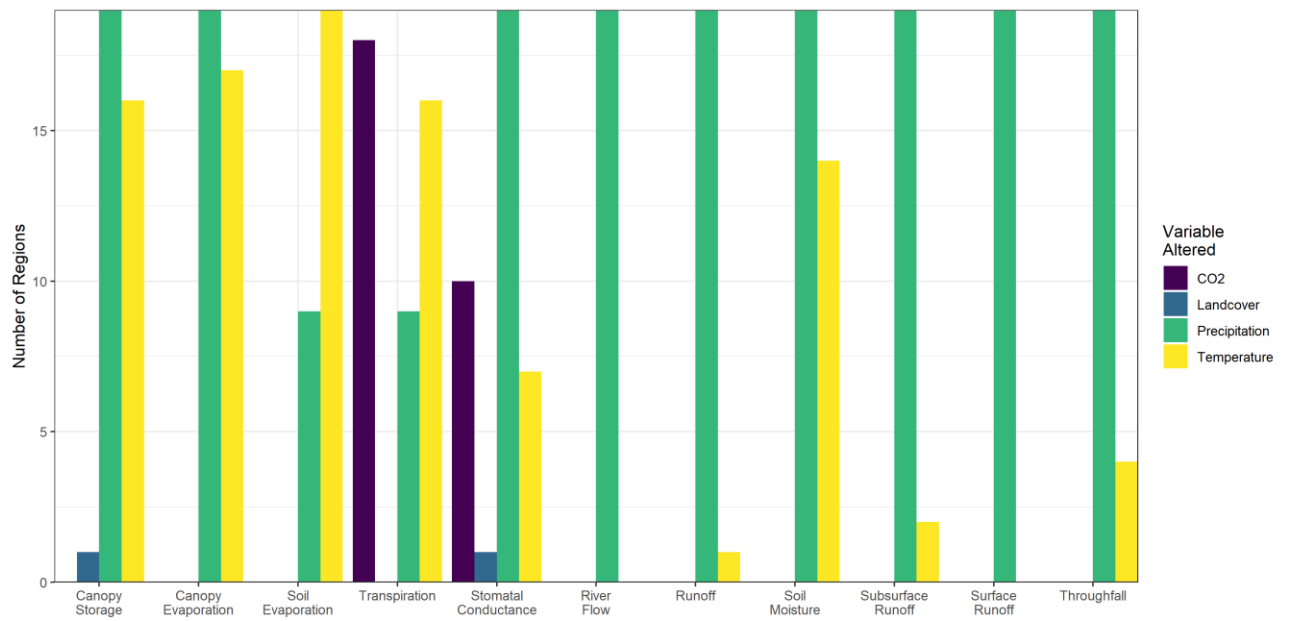

25 **Figure S3: Number of UKCP18 regions that show significant changes ( $p < 0.01$  with ANOVA) in the system states (on the x axis), for the entire period for the four variables altered: CO<sub>2</sub>, afforestation (landcover), precipitation and temperature. Only in the Orkney and Shetland region are significant changes seen due to afforestation. Figure S4 shows how this varies per season. Northeast Scotland not included due to computational issues.**

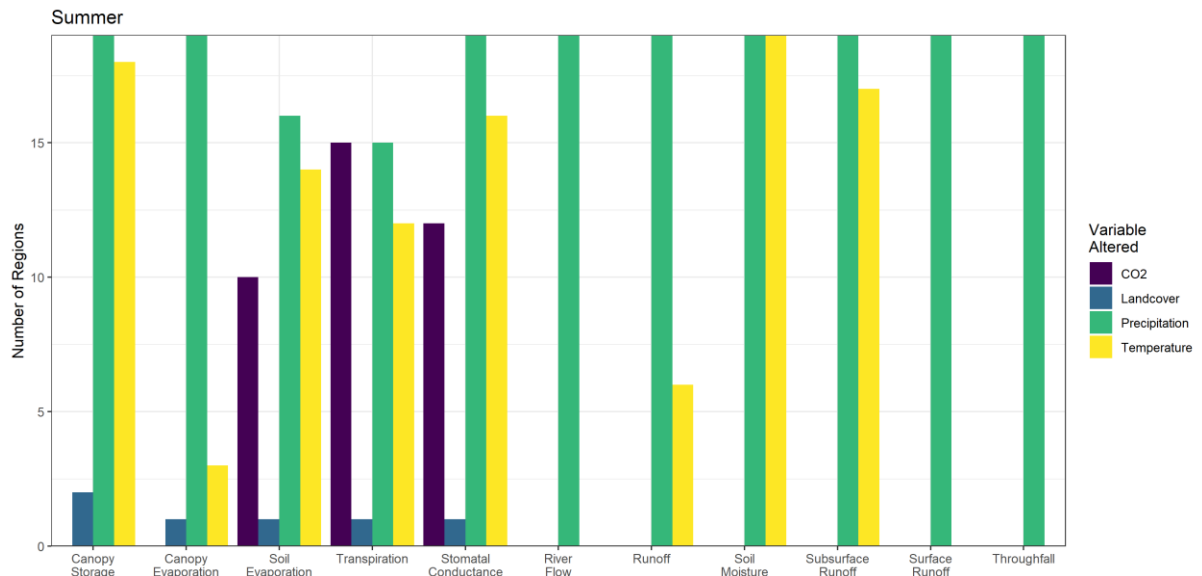

30

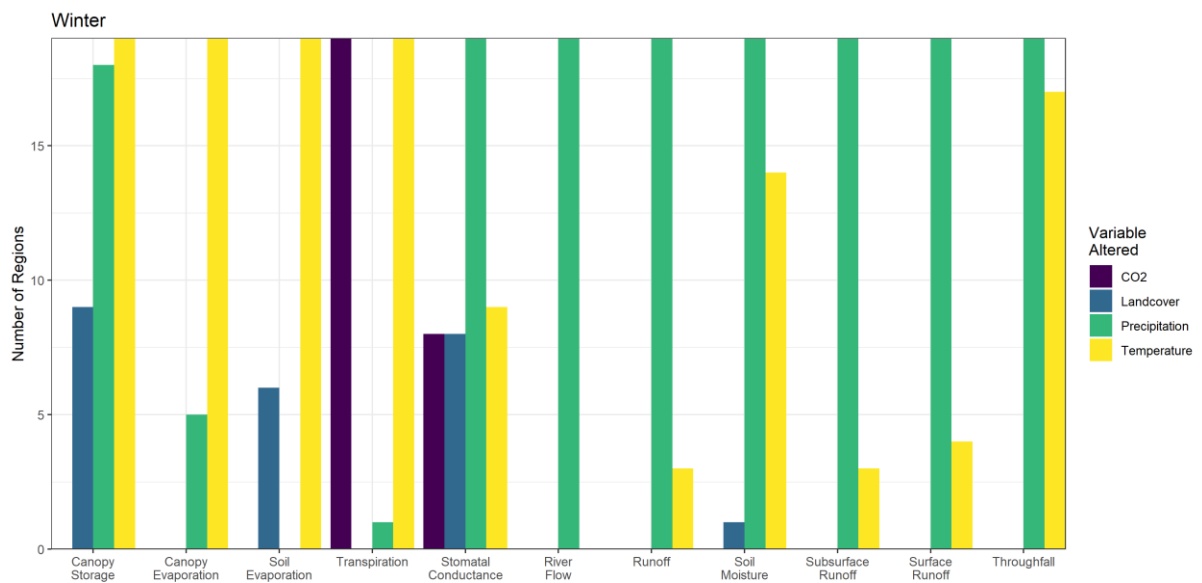

**Figure S4: Number of UKCP18 regions that show significant changes ( $p < 0.01$  with ANOVA) in the system states (on the x axis), for the entire period for the four variables altered: CO<sub>2</sub>, afforestation (landcover), precipitation and temperature. The graphs are for winter and summer. Northeast Scotland not included due to computational issues.**

35

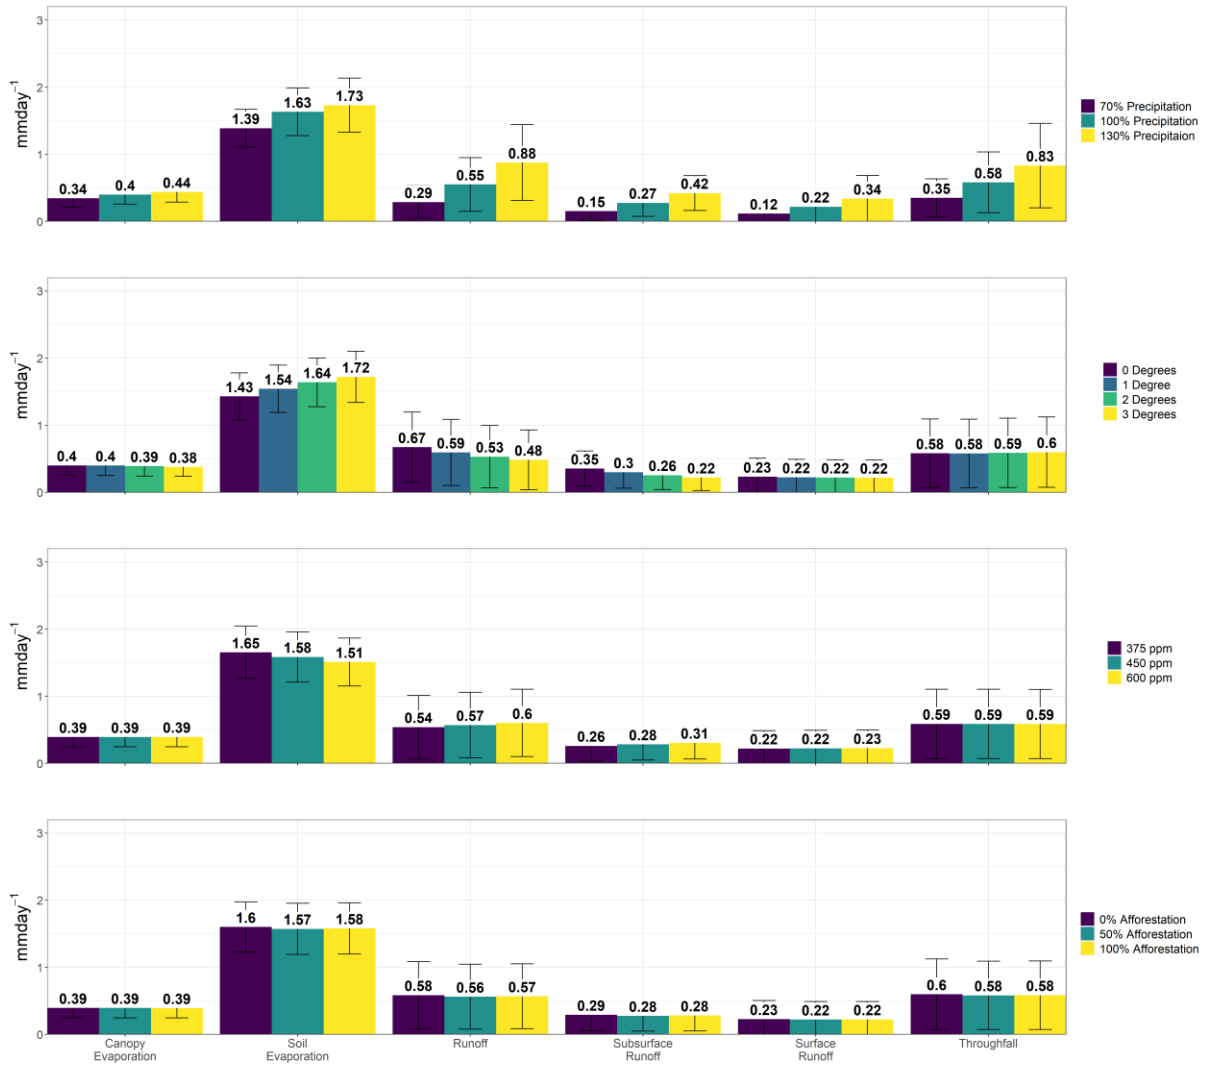

Figure S5: Mean hydrological fluxes across all UKCP18 regions in summer for each of the four variables altered: precipitation, temperature, CO2 and landcover. Error bars indicate one standard deviation.

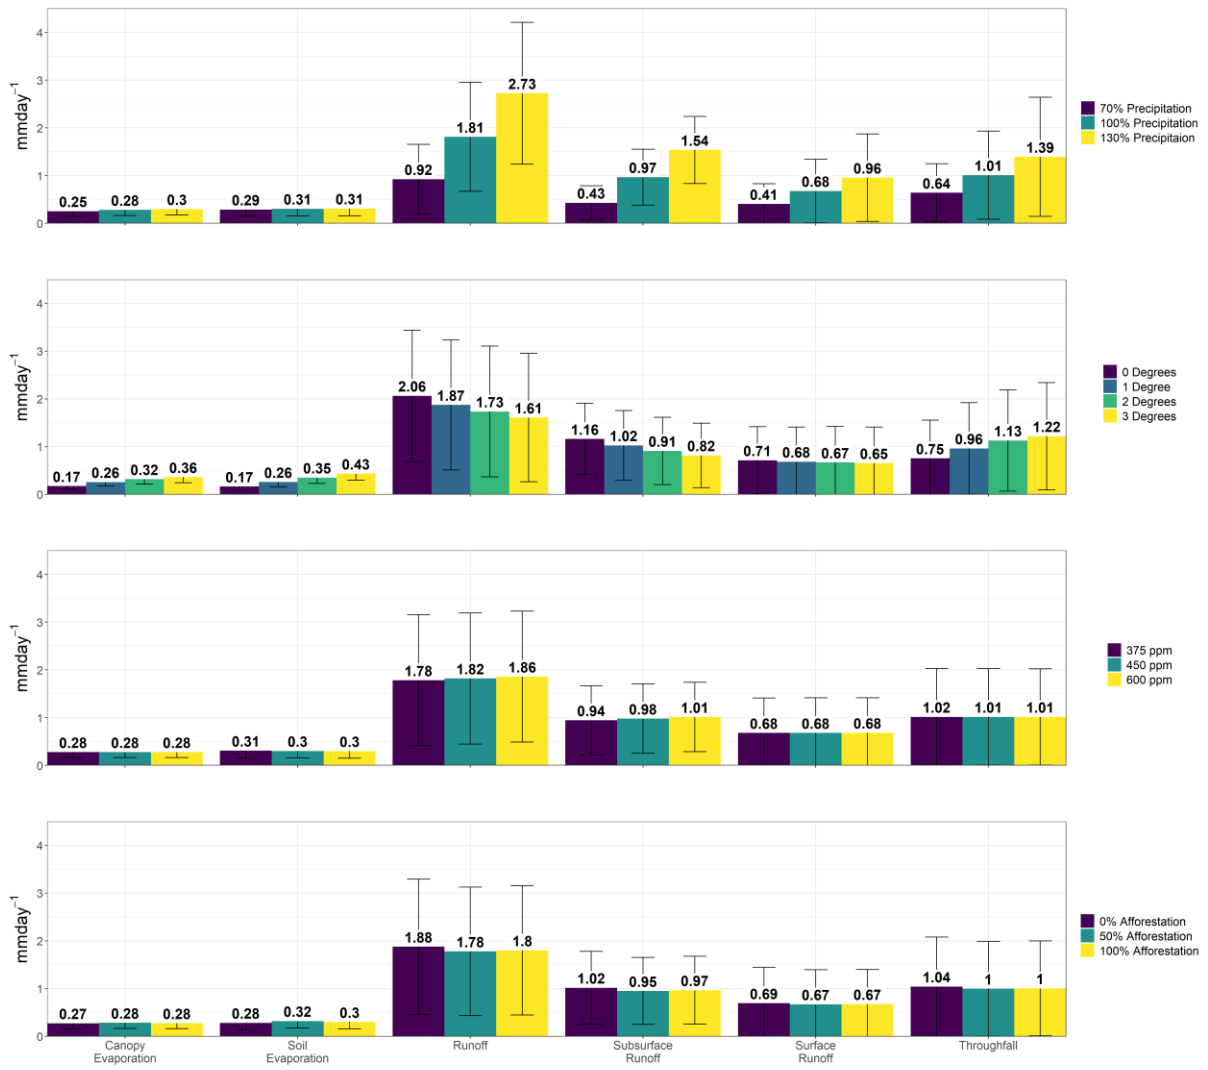

**Figure S6: Mean hydrological fluxes across all UKCP18 regions in winter for each of the four variables altered: precipitation, temperature, CO<sub>2</sub> and landcover. Error bars indicate one standard deviation.**



**Table S1: Error metrics for the 51 catchments in this study for the period 2000-2015.**

| <b>Station</b> | <b>NSE</b> | <b>KGE</b> | <b>R<sup>2</sup></b> |
|----------------|------------|------------|----------------------|
| 2002           | 0.36       | 0.43       | 0.39                 |
| 7001           | 0.14       | 0.21       | 0.20                 |
| 8004           | 0.06       | 0.28       | 0.19                 |
| 8009           | 0.18       | 0.37       | 0.26                 |
| 8013           | 0.10       | 0.40       | 0.26                 |
| 11004          | -0.11      | 0.47       | 0.39                 |
| 12002          | 0.23       | 0.38       | 0.27                 |
| 15006          | 0.48       | 0.68       | 0.53                 |
| 17005          | 0.20       | 0.15       | 0.34                 |
| 18001          | 0.41       | 0.48       | 0.48                 |
| 21006          | 0.44       | 0.60       | 0.45                 |
| 22001          | 0.16       | 0.39       | 0.23                 |
| 23004          | 0.12       | 0.35       | 0.19                 |
| 27009          | 0.45       | 0.61       | 0.48                 |
| 27035          | 0.50       | 0.59       | 0.53                 |
| 27041          | 0.46       | 0.70       | 0.59                 |
| 33019          | -0.18      | 0.15       | 0.42                 |
| 34011          | -0.03      | 0.30       | 0.64                 |
| 37005          | 0.62       | 0.70       | 0.64                 |
| 39001          | 0.66       | 0.63       | 0.78                 |
| 40005          | 0.60       | 0.48       | 0.67                 |
| 40011          | 0.47       | 0.64       | 0.70                 |
| 43021          | -0.27      | 0.40       | 0.44                 |
| 45005          | 0.04       | 0.48       | 0.27                 |
| 46003          | 0.49       | 0.53       | 0.53                 |
| 47001          | 0.46       | 0.61       | 0.49                 |
| 50002          | 0.42       | 0.49       | 0.43                 |
| 53006          | 0.60       | 0.51       | 0.66                 |
| 53008          | 0.55       | 0.53       | 0.61                 |
| 54057          | 0.63       | 0.68       | 0.63                 |
| 55014          | 0.05       | 0.55       | 0.41                 |
| 55026          | 0.43       | 0.65       | 0.48                 |
| 55029          | 0.23       | 0.58       | 0.35                 |
| 60003          | 0.35       | 0.57       | 0.46                 |
| 62001          | 0.67       | 0.66       | 0.70                 |
| 64001          | 0.45       | 0.58       | 0.49                 |
| 67033          | 0.58       | 0.76       | 0.64                 |
| 68005          | 0.16       | 0.08       | 0.60                 |
| 71001          | 0.19       | 0.42       | 0.24                 |
| 72005          | 0.16       | 0.39       | 0.25                 |
| 73005          | 0.25       | 0.50       | 0.34                 |
| 79002          | 0.37       | 0.53       | 0.39                 |
| 81002          | 0.25       | 0.48       | 0.30                 |
| 81004          | 0.36       | 0.26       | 0.54                 |
| 83006          | 0.22       | 0.30       | 0.23                 |
| 84013          | 0.48       | 0.50       | 0.50                 |
| 94001          | 0.39       | 0.67       | 0.61                 |
| 96002          | 0.44       | 0.54       | 0.46                 |
| 106001         | 0.38       | 0.35       | 0.64                 |
| 107001         | 0.20       | 0.11       | 0.67                 |

**Table S2. Topsoil moisture error metrics for the twelve COSMOS-UK sites [Figure S2], ordered by Nash-Sutcliffe Efficiency (NSE) score.**

| <b>COSMOS-UK Site</b>  | <b>NSE</b> | <b>KGE</b> | <b>R<sup>2</sup></b> |
|------------------------|------------|------------|----------------------|
| <b>Gisburn Forest</b>  | -33.58     | 0.26       | 0.36                 |
| <b>Chobham Common</b>  | -7.93      | 0.23       | 0.62                 |
| <b>Stiperstones</b>    | -6.32      | 0.20       | 0.70                 |
| <b>Wytham Woods</b>    | -5.13      | 0.29       | 0.15                 |
| <b>Hollin Hill</b>     | -4.93      | 0.34       | 0.61                 |
| <b>Heytesbury</b>      | -4.63      | 0.52       | 0.73                 |
| <b>Sheepdrove</b>      | -1.15      | 0.57       | 0.67                 |
| <b>Alice Holt</b>      | -0.86      | 0.43       | 0.21                 |
| <b>Chimney Meadows</b> | 0.29       | 0.68       | 0.79                 |
| <b>Hartwood Home</b>   | 0.47       | 0.45       | 0.51                 |
| <b>Waddesdon</b>       | 0.49       | 0.58       | 0.61                 |
| <b>Rothamsted</b>      | 0.81       | 0.82       | 0.84                 |

**Table S3. Potential evapotranspiration error metrics for the twelve COSMOS-UK sites [Figure S2], ordered by Nash-Sutcliffe Efficiency (NSE) score.**

| <b>COSMOS-UK Site</b>  | <b>NSE</b> | <b>KGE</b> | <b>R<sup>2</sup></b> |
|------------------------|------------|------------|----------------------|
| <b>Hartwood Home</b>   | -0.46      | 0.22       | 0.55                 |
| <b>Chimney Meadows</b> | -0.23      | 0.27       | 0.62                 |
| <b>Rothamsted</b>      | -0.13      | 0.32       | 0.62                 |
| <b>Sheepdrove</b>      | 0.11       | 0.46       | 0.62                 |
| <b>Alice Holt</b>      | 0.11       | 0.54       | 0.53                 |
| <b>Heytesbury</b>      | 0.13       | 0.51       | 0.57                 |
| <b>Hollin Hill</b>     | 0.20       | 0.55       | 0.59                 |
| <b>Gisburn Forest</b>  | 0.28       | 0.60       | 0.59                 |
| <b>Stiperstones</b>    | 0.43       | 0.70       | 0.61                 |
| <b>Wytham Woods</b>    | 0.44       | 0.47       | 0.67                 |
| <b>Chobham Common</b>  | 0.45       | 0.72       | 0.60                 |
| <b>Waddesdon</b>       | 0.46       | 0.69       | 0.57                 |

**Table S4. Catchment attributes for those in this study as derived from the CAMELS-GB (Coxon et al. 2020) dataset (which is produced using the data used to drive JULES in this study). Also included is the percentage increase in woodland for the catchments.**

| Station | Mean Precipitation (mm day <sup>-1</sup> ) | Mean Potential Evapotranspiration (mm day <sup>-1</sup> ) | Runoff Ratio | Area (km <sup>2</sup> ) | Mean Elevation (m) | Percentage Increase in Woodland | Percentage Point Increase in Woodland |
|---------|--------------------------------------------|-----------------------------------------------------------|--------------|-------------------------|--------------------|---------------------------------|---------------------------------------|
| 2002    | 3.41                                       | 1.11                                                      | 0.72         | 423.48                  | 259.00             | 2400.56                         | 6.31                                  |
| 7001    | 3.42                                       | 1.07                                                      | 0.87         | 415.59                  | 560.00             | 279.83                          | 5.06                                  |
| 8004    | 3.08                                       | 1.07                                                      | 0.75         | 540.75                  | 525.00             | 191.08                          | 6.99                                  |
| 8009    | 2.83                                       | 1.09                                                      | 0.69         | 272.20                  | 461.00             | 513.50                          | 6.66                                  |
| 8013    | 3.68                                       | 1.03                                                      | 0.78         | 229.63                  | 618.00             | 243.06                          | 1.10                                  |
| 11004   | 2.44                                       | 1.20                                                      | 0.59         | 195.44                  | 206.00             | 649.39                          | 18.38                                 |
| 12002   | 3.11                                       | 1.11                                                      | 0.71         | 1833.21                 | 447.00             | 197.31                          | 5.86                                  |
| 15006   | 4.16                                       | 1.12                                                      | 0.81         | 4586.79                 | 411.00             | 137.37                          | 7.11                                  |
| 17005   | 2.87                                       | 1.25                                                      | 0.65         | 194.81                  | 161.00             | 165.89                          | 13.64                                 |
| 18001   | 4.10                                       | 1.20                                                      | 0.72         | 160.29                  | 245.00             | 446.06                          | 13.37                                 |
| 21006   | 3.35                                       | 1.21                                                      | 0.64         | 1505.54                 | 358.00             | 282.73                          | 11.75                                 |
| 22001   | 2.39                                       | 1.32                                                      | 0.53         | 578.25                  | 225.00             | 33.76                           | 2.28                                  |
| 23004   | 3.18                                       | 1.26                                                      | 0.66         | 749.89                  | 350.00             | 16.95                           | 0.69                                  |
| 27009   | 2.52                                       | 1.35                                                      | 0.53         | 3300.80                 | 185.00             | 13.87                           | 0.76                                  |
| 27035   | 3.18                                       | 1.33                                                      | 0.63         | 283.39                  | 230.00             | 132.47                          | 6.42                                  |
| 27041   | 2.15                                       | 1.37                                                      | 0.42         | 1594.24                 | 128.00             | 2.82                            | 0.23                                  |
| 33019   | 1.76                                       | 1.48                                                      | 0.30         | 311.37                  | 39.00              | 13.93                           | 1.28                                  |
| 34011   | 1.94                                       | 1.47                                                      | 0.23         | 162.93                  | 62.00              | 2.95                            | 0.17                                  |
| 37005   | 1.61                                       | 1.47                                                      | 0.25         | 235.88                  | 66.00              | 2.02                            | 0.13                                  |
| 39001   | 1.99                                       | 1.42                                                      | 0.27         | 9930.80                 | 109.00             | 9.23                            | 1.25                                  |
| 40005   | 1.94                                       | 1.40                                                      | 0.33         | 278.05                  | 45.00              | 1.75                            | 0.23                                  |
| 40011   | 2.10                                       | 1.40                                                      | 0.38         | 341.26                  | 84.00              | 0.68                            | 0.10                                  |
| 42016   | 2.41                                       | 1.41                                                      | 0.67         | 234.17                  | 123.00             | 0.04                            | 0.00                                  |
| 43021   | 2.33                                       | 1.43                                                      | 0.44         | 1712.31                 | 120.00             | 0.43                            | 0.04                                  |
| 45005   | 2.75                                       | 1.45                                                      | 0.50         | 202.83                  | 144.00             | 2.28                            | 0.25                                  |
| 46003   | 5.16                                       | 1.42                                                      | 0.75         | 249.99                  | 327.00             | 0.03                            | 0.00                                  |
| 47001   | 3.43                                       | 1.44                                                      | 0.62         | 920.22                  | 155.00             | 69.29                           | 6.09                                  |
| 50002   | 3.37                                       | 1.43                                                      | 0.61         | 664.25                  | 160.00             | 44.87                           | 5.23                                  |
| 53006   | 2.29                                       | 1.43                                                      | 0.44         | 151.63                  | 73.00              | 11.16                           | 0.55                                  |
| 53008   | 2.27                                       | 1.44                                                      | 0.42         | 305.17                  | 119.00             | 10.48                           | 0.76                                  |
| 54057   | 2.22                                       | 1.40                                                      | 0.42         | 9885.46                 | 145.00             | 24.56                           | 2.20                                  |
| 55014   | 2.84                                       | 1.36                                                      | 0.59         | 202.54                  | 299.00             | 181.38                          | 7.88                                  |
| 55026   | 4.61                                       | 1.33                                                      | 0.76         | 172.12                  | 387.00             | 337.28                          | 6.18                                  |
| 55029   | 2.73                                       | 1.38                                                      | 0.54         | 355.01                  | 228.00             | 11.03                           | 1.27                                  |
| 60003   | 4.02                                       | 1.43                                                      | 0.76         | 216.44                  | 125.00             | 381.18                          | 18.33                                 |
| 62001   | 3.85                                       | 1.37                                                      | 0.74         | 897.59                  | 209.00             | 193.36                          | 12.63                                 |
| 64001   | 5.18                                       | 1.32                                                      | 0.85         | 464.61                  | 281.00             | 70.36                           | 6.30                                  |
| 67033   | 3.11                                       | 1.35                                                      | 0.51         | 1800.75                 | 242.00             | 50.66                           | 3.28                                  |
| 68005   | 1.96                                       | 1.41                                                      | 0.34         | 201.38                  | 89.00              | 13.30                           | 0.54                                  |
| 71001   | 3.73                                       | 1.32                                                      | 0.67         | 1144.70                 | 220.00             | 55.52                           | 4.12                                  |
| 72005   | 4.72                                       | 1.27                                                      | 0.85         | 219.24                  | 317.00             | 40.66                           | 1.37                                  |
| 73005   | 4.88                                       | 1.29                                                      | 0.78         | 212.24                  | 234.00             | 69.51                           | 3.89                                  |
| 79002   | 4.22                                       | 1.22                                                      | 0.74         | 797.71                  | 294.00             | 432.43                          | 14.44                                 |
| 81002   | 5.20                                       | 1.25                                                      | 0.73         | 366.21                  | 238.00             | 63.01                           | 2.21                                  |
| 81004   | 3.87                                       | 1.33                                                      | 0.67         | 329.07                  | 105.00             | 140.46                          | 4.29                                  |
| 83006   | 3.51                                       | 1.23                                                      | 0.66         | 579.03                  | 219.00             | 552.96                          | 12.03                                 |
| 84013   | 3.28                                       | 1.22                                                      | 0.68         | 1901.23                 | 265.00             | 334.33                          | 13.56                                 |
| 94001   | 6.49                                       | 1.07                                                      | 0.90         | 441.21                  | 311.00             | 6.01                            | 0.08                                  |
| 96002   | 3.81                                       | 1.08                                                      | 0.75         | 474.01                  | 224.00             | 358.55                          | 5.03                                  |
| 106001  | 4.16                                       | 1.13                                                      | 0.78         | 44.93                   | 100.00             | 0.00                            | 0.00                                  |
| 107001  | 3.16                                       | 1.07                                                      | 0.73         | 19.60                   | 99.00              | 1.75E+20                        | 5.58                                  |

60 Coxon, G. et al. (2020) 'CAMELS-GB: hydrometeorological time series and landscape attributes for 671 catchments in Great Britain', *Earth System Science Data*, 12(4), pp. 2459–2483. doi:10.5194/essd-12-2459-2020.

## Supplementary Equation

65

$$KGE = 1 - \sqrt{(r - 1)^2 + \left(\frac{\sigma_{sim}}{\sigma_{obs}} - 1\right)^2 + \left(\frac{\mu_{sim}}{\mu_{obs}} - 1\right)^2}$$

KGE = Kling-Gupta Efficiency Score

$\sigma_{sim}$  = simulated discharge

70  $\sigma_{obs}$  = observed discharge

r = linear correlation between simulated and observed discharge

$\mu_{sim}$  = mean simulated discharge

$\mu_{obs}$  = mean observed discharge
